# Supplementary material
Source: MDPI journal article supplement (https://www.mdpi.com/2073-4344/8/11/558)
Supplement: s1 [file s1]

**Synthesis, APPI Mass-Spectrometric Characterization, and Polymerization Studies  
of Group 4 Dinuclear Bis(*ansa*-metallocene) Complexes**

Gilles Schnee, Mathilde Farenc, Leslie Bitard, Aurelien Vantomme, Alexandre Welle, Jean-

Michel Brusson, Carlos Afonso, Pierre Giusti, Jean-François Carpentier, Evgueni Kirillov

- Figure S1.**  $^1\text{H}$  NMR spectrum of **1a**.  
**Figure S2.**  $^{13}\text{C}$  NMR spectrum of **1a**.  
**Figure S3.** ASAP mass spectrum of **1a**.  
**Figure S4.**  $^1\text{H}$  NMR spectrum of **1b**.  
**Figure S5.**  $^{13}\text{C}$  NMR spectrum of **1b**.  
**Figure S6.**  $^1\text{H}$  NMR spectrum of **1c**.  
**Figure S7.**  $^{13}\text{C}$  NMR spectrum of **1c**.  
**Figure S8.** ASAP mass spectrum of **1c**.  
**Figure S9.**  $^1\text{H}$  NMR spectrum of **2a**.  
**Figure S10.**  $^{13}\text{C}$  NMR spectrum of **2a**.  
**Figure S11.** ASAP mass spectrum of **2a**.  
**Figure S12.**  $^1\text{H}$  NMR spectrum of **2b**.  
**Figure S13.**  $^{13}\text{C}$  NMR spectrum of **2b**.  
**Figure S14.** ASAP mass spectrum of **2b**.  
**Figure S15.**  $^1\text{H}$  NMR spectrum of **2c**.  
**Figure S16.**  $^{13}\text{C}$  NMR spectrum of **2c**.  
**Figure S17.** ASAP mass spectrum of **2c**.  
**Figure S18.**  $^1\text{H}$  NMR spectrum of **2a'**.  
**Figure S19.**  $^{13}\text{C}$  NMR spectrum of **2a'**.  
**Figure S20.** ASAP mass spectrum of **2a'**.  
**Figure S21.**  $^1\text{H}$  NMR spectrum of **2b'**.  
**Figure S22.**  $^{13}\text{C}$  NMR spectrum of **2b'**.  
**Figure S23.** ASAP mass spectrum of **2b'**.  
**Figure S24.**  $^1\text{H}$  NMR spectrum of **3a-Zr<sub>2</sub>**.  
**Figure S25.** HMBC spectrum of **3a-Zr<sub>2</sub>**.  
**Figure S26.** HSQC spectrum of **3a-Zr<sub>2</sub>**.  
**Figure S27.** APPI-IMMS of **3a-Zr<sub>2</sub>**.  
**Figure S28.**  $^1\text{H}$  NMR spectrum of **3a-Hf<sub>2</sub>**.  
**Figure S29.**  $^{13}\text{C}$  NMR spectrum of **3a-Hf<sub>2</sub>**.  
**Figure S30.** APPI-IMMS of **3a-Hf<sub>2</sub>**.  
**Figure S31.**  $^1\text{H}$  NMR spectrum of **3b-Zr<sub>2</sub>**.  
**Figure S32.** HMBC spectrum of **3b-Zr<sub>2</sub>**.  
**Figure S33.** HSQC spectrum of **3b-Zr<sub>2</sub>**.  
**Figure S34.** APPI-IMMS of **3b-Zr<sub>2</sub>**.  
**Figure S35.**  $^1\text{H}$  NMR spectrum of **3c-Zr<sub>2</sub>**.  
**Figure S36.**  $^{13}\text{C}$  NMR spectrum of **3c-Zr<sub>2</sub>**.  
**Figure S37.**  $^1\text{H}$  NMR spectrum of **3a'-Zr**.  
**Figure S38.**  $^{13}\text{C}$  NMR spectrum of **3a'-Zr**.  
**Figure S39.** APPI-IMMS of **3a'-Zr**.  
**Figure S40.**  $^1\text{H}$  NMR spectrum of **3b'-Zr**.

**Figure S41.**  $^{13}\text{C}$  NMR spectrum of **3b'-Zr**.  
**Figure S42.** APPI-IMMS of **3b'-Zr**.  
**Figure S43.**  $^1\text{H}$  NMR spectrum of **3b'-Hf**.  
**Figure S44.**  $^{13}\text{C}$  NMR spectrum of **3b'-Hf**.  
**Figure S45.** APPI-IMMS of **3b'-Hf**.  
**Figure S46.**  $^{13}\text{C}$  NMR spectrum of PE (Table 1, run 1).  
**Figure S47.** GPC trace of PE (Table 1, run 1) obtained with **3a-Zr<sub>2</sub>**.  
**Figure S48.**  $^{13}\text{C}$  NMR spectrum of PE (Table 1, run 3).  
**Figure S49.**  $^{13}\text{C}$  NMR spectrum of PE (Table 1, run 5).  
**Figure S50.** GPC trace of PE (Table 1, run 5) obtained with **3b-Zr<sub>2</sub>**.  
**Figure S51.** GPC trace of PE (Table 1, run 6) obtained with **3b-Zr<sub>2</sub>**.  
**Figure S52.** GPC trace of PE (Table 1, run 7) obtained with **3b'-Zr**.  
**Figure S53.** GPC trace of PE (Table 1, run 8) obtained with **3b'-Zr**.  
**Figure S54.** GPC trace of PE (Table 1, run 9) obtained with **3c-Zr<sub>2</sub>**.  
**Figure S55.** GPC trace of PE (Table 1, run 12) obtained with **3b'-Hf**.  
**Figure S57.** GPC trace of PE/PHex (Table 2, run 1) obtained with **3a-Zr<sub>2</sub>**.  
**Figure S58.**  $^{13}\text{C}$  NMR spectrum of PE/PHex (Table 2, run 4).  
**Figure S59.**  $^{13}\text{C}$  NMR spectrum of PE/PHex (Table 2, run 5).  
**Figure S60.** GPC trace of PE/PHex (Table 2, run 5) obtained with **3b-Zr<sub>2</sub>**.  
**Figure S61.** GPC trace of PE/PHex (Table 2, run 6) obtained with **3b-Zr<sub>2</sub>**.  
**Figure S62.** GPC trace of PE/PHex (Table 2, run 7) obtained with **3b'-Zr**.  
**Figure S63.** GPC trace of PE/PHex (Table 2, run 8) obtained with **3b'-Zr**.  
**Figure S64.** GPC trace of PE/PHex (Table 2, run 9) obtained with **3c-Zr<sub>2</sub>**.  
**Figure S65.** GPC trace of PE/PHex (Table 2, run 10) obtained with **3a-Hf<sub>2</sub>**.  
**Figure S66.** GPC trace of PE/PHex (Table 2, run 11) obtained with **3a-Hf<sub>2</sub>**.  
**Figure S67.** Molecular structure of **3a'-Zr**.  
**Table S1.** Summary of Crystal and Refinement Data for Compound **3a'-Zr**.  
**Figure S68.** DFT-optimized structures of  $C_s$ -symmetric and  $C_i$ -symmetric isomers of **3a-Zr<sub>2</sub>**.  
**Figure S69.** DFT-optimized structures of  $C_s$ -symmetric and  $C_1$ -symmetric isomers of **3c-Zr<sub>2</sub>**.

Cartesian coordinates

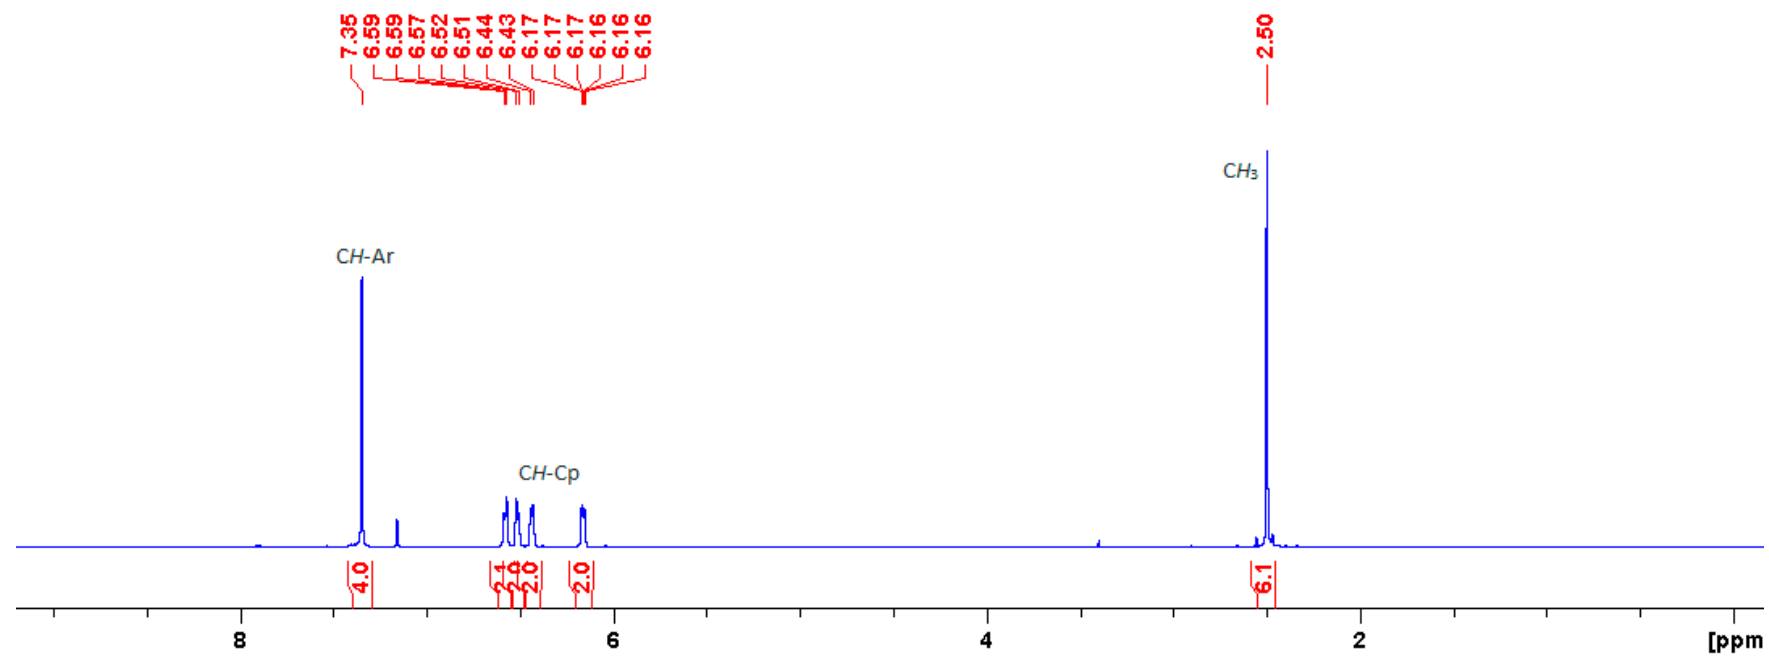

**Figure S1.** <sup>1</sup>H NMR spectrum (CDCl<sub>3</sub>, 400 MHz, 25 °C) of **1a**. jfc-gs190-1

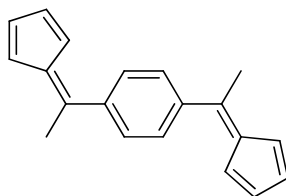

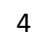

**Figure S2.**  $^{13}\text{C}$  NMR spectrum ( $\text{CDCl}_3$ , 125 MHz, 25 °C) of **1a**.

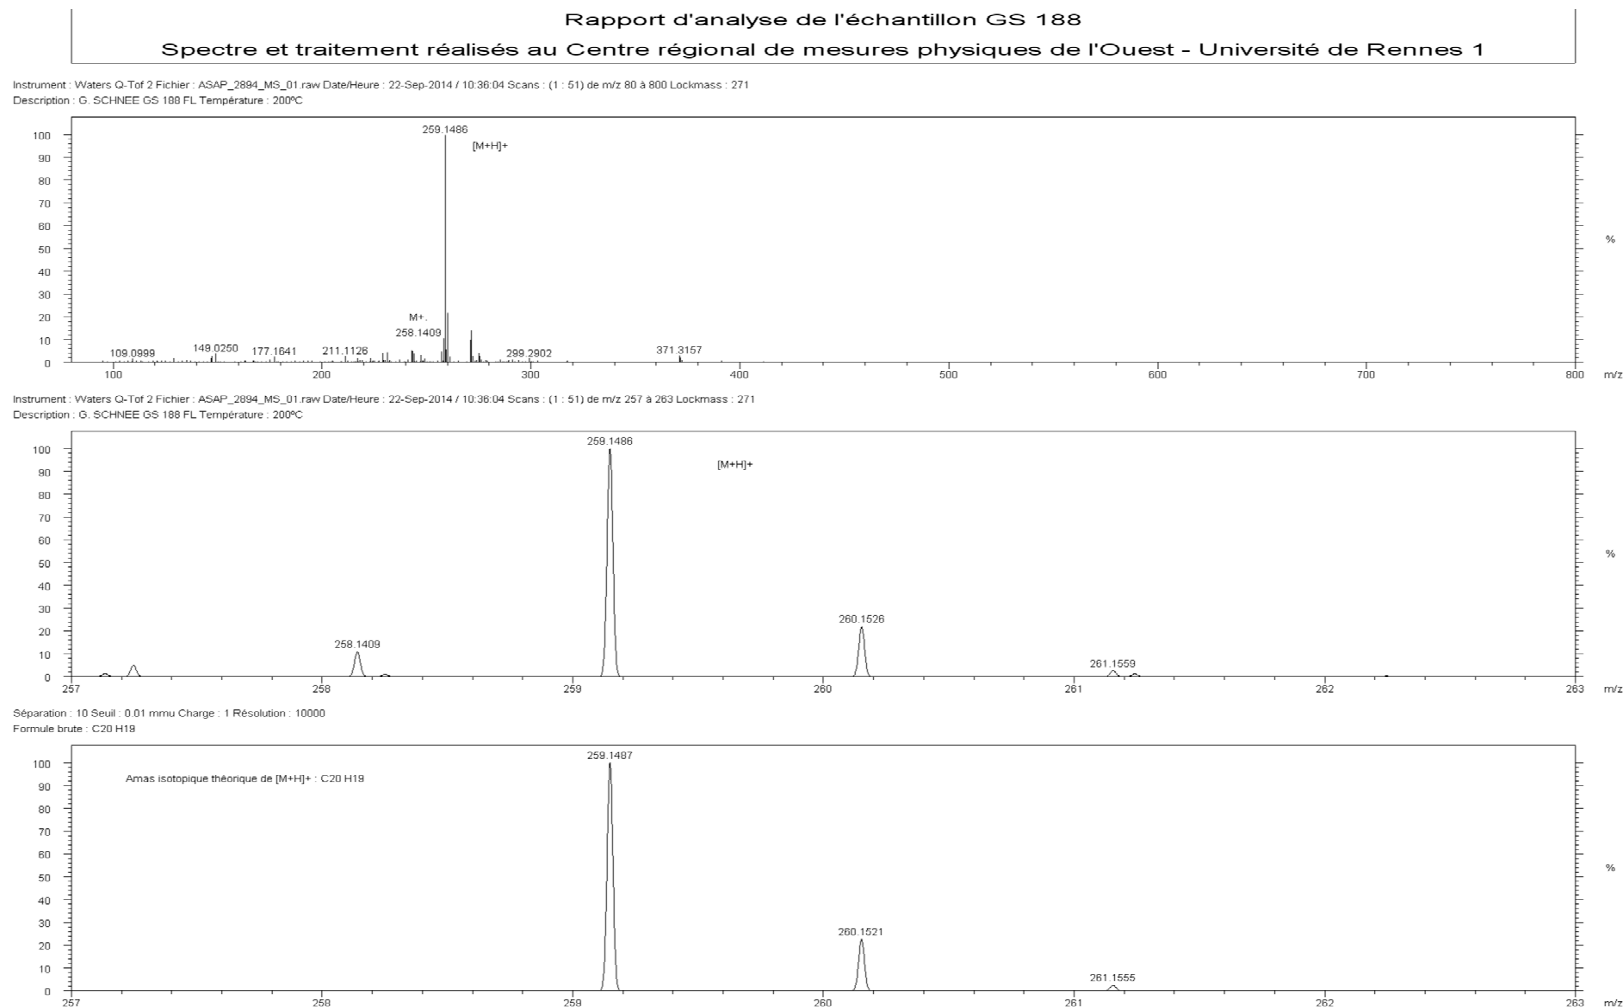

**Figure S3.** ASAP mass spectrum of **1a**.
